# Supplementary material for: BRG1 knockdown inhibits proliferation through multiple cellular pathways in prostate cancer
Source: PubMed Central journal article supplement (PMC7888175; doi:10.1186/s13148-021-01023-7), 2021-02-17

# SUPPLEMENTARY FIGURE 2

**A**

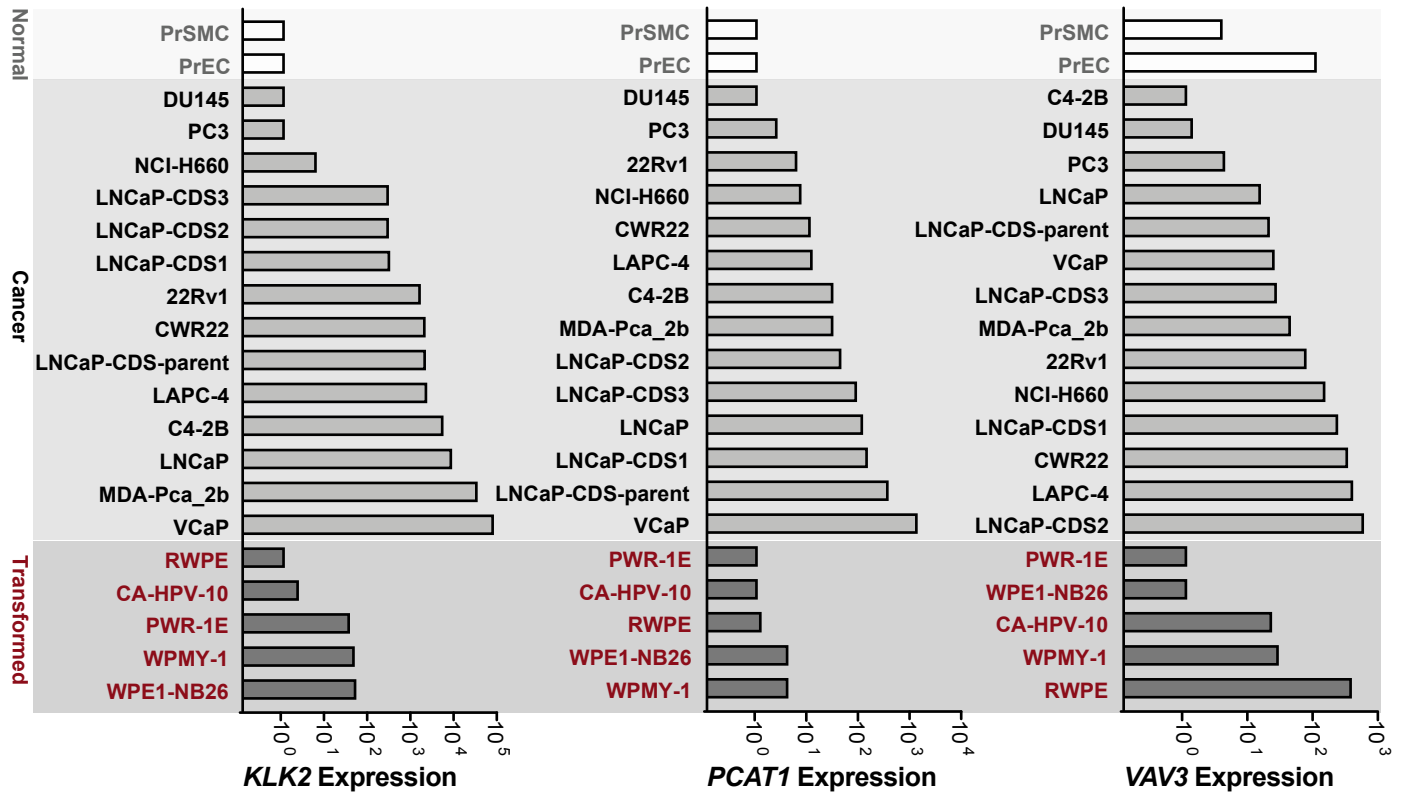

**B**

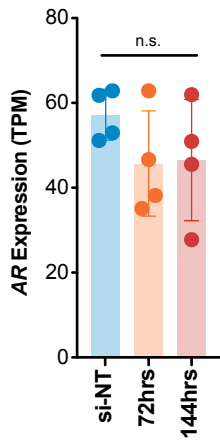

**C**

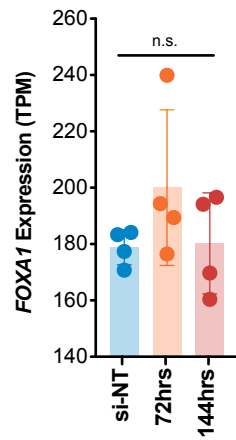

Supplement: 13148_2021_1023_MOESM2_ESM.pdf [file 13148_2021_1023_MOESM2_ESM.pdf]
